# Supplementary material
Source: ML conference proceedings conference paper supplement (https://proceedings.mlr.press/v84/abbati18a.html)
Supplement: Supplementary file [file abbati18a-supp.pdf]

**A Autocorrelation Plots**

Here we report the autocorrelation plots for the experiment described in section 5.1, respectively for  $\theta_1$  and  $\theta_2$ . Standard Metropolis-Hastings can be found on the left while our method, SGLD with AdaGeo, on the right. While Metropolis-Hastings suffers from high autocorrelation despite a long burn-in and large thinning factor, samples from SGLD-AdaGeo does not show any autocorrelation issues.

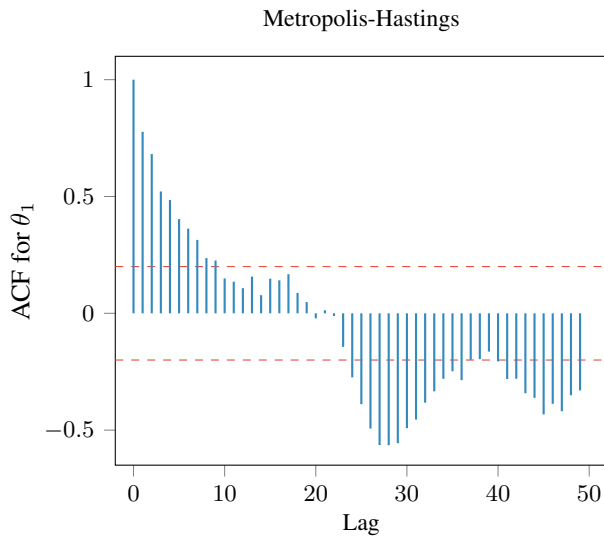

(a) Metropolis-Hastings: Autocorrelation function for  $\theta_1$   
AdaGeo-SGLD

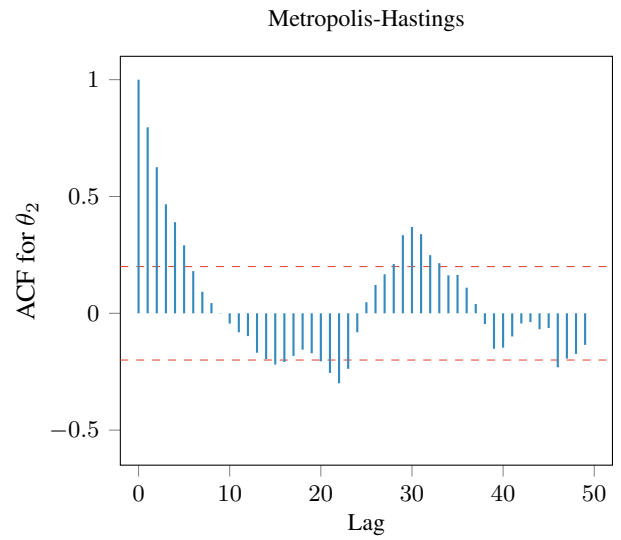

(b) Metropolis-Hastings: Autocorrelation function for  $\theta_2$   
AdaGeo-SGLD

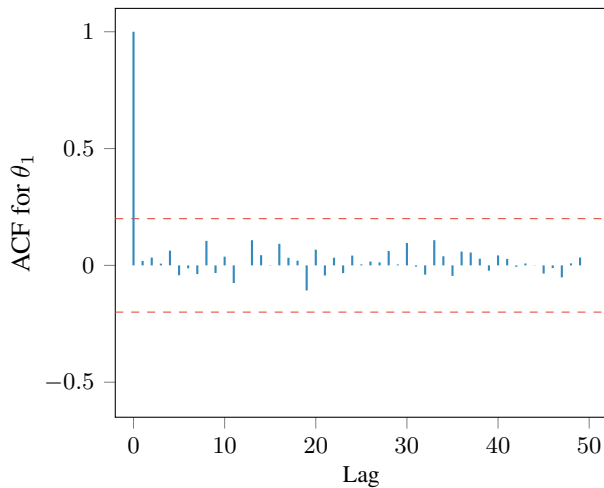

(c) AdaGeo-SGLD: Autocorrelation function for  $\theta_1$

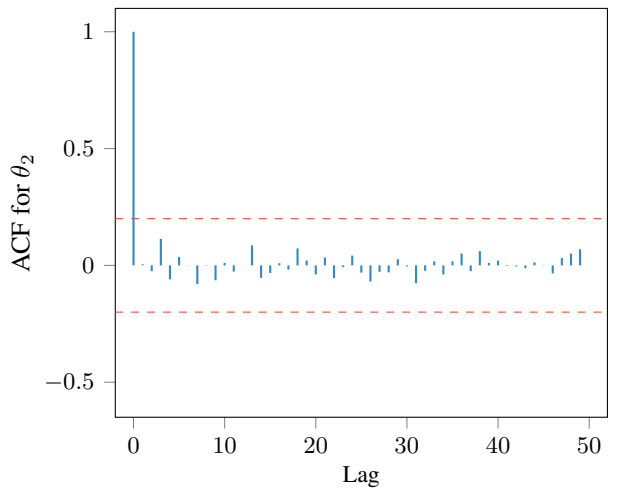

(d) AdaGeo-SGLD: Autocorrelation function for  $\theta_2$
